# Supplementary material
Source: Springer Nature journal article supplement (https://www.springermedizin.de/resource/supplementary/13014_2013_921_MOESM5_ESM.pdf/9634408)

Pericardium

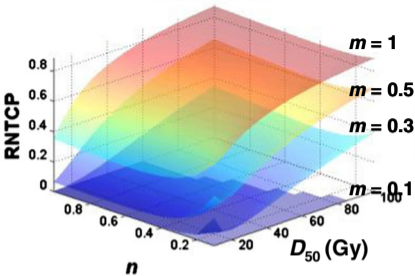

Myocardium

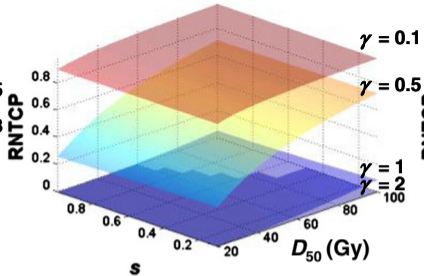

Whole heart

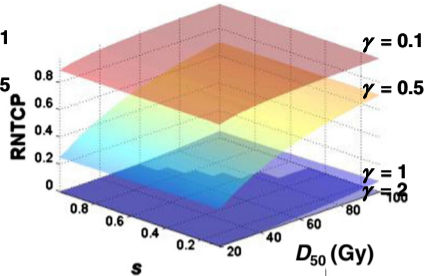

Pericardium

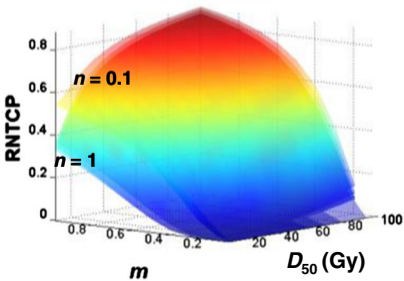

Myocardium

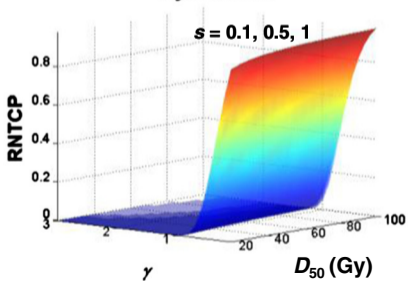

Whole heart

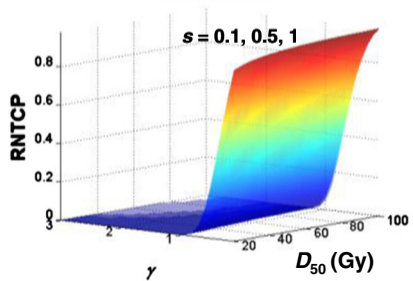

Supplement: MOESM5 [file 9634408]
